# Supplementary material for: Yoga is effective for treating chronic pain in veterans with Gulf War Illness at long-term follow-up
Source: PubMed Central journal article supplement (PMC10498617; doi:10.1186/s12906-023-04145-y), 2023-09-13
Supplement: 12906_2023_4145_MOESM1_ESM.pdf [file 12906_2023_4145_MOESM1_ESM.pdf]

## APPENDIX 1

Table 1

*Effect size estimates by group (Yoga vs. CBT) and follow-up time period for secondary outcome measures*

| Treatment | Follow-up | Walk Distance<br>Mean              | Walk Distance<br>Cohen's <i>d</i> | Depression<br>Mean              | Depression<br>Cohen's <i>d</i> | Autonomic Symptom<br>Severity Mean | Autonomic Symptom<br>Severity Cohen's <i>d</i> | Quality of Life<br>Mean          | Quality of Life<br>Cohen's <i>d</i> |
|-----------|-----------|------------------------------------|-----------------------------------|---------------------------------|--------------------------------|------------------------------------|------------------------------------------------|----------------------------------|-------------------------------------|
| Yoga      | EOT       | 492.49 ±121.53<br>( <i>n</i> = 30) | -1.26                             | 11.25 ±8.04<br>( <i>n</i> = 32) | -0.05                          | 21.46 ±17.00<br>( <i>n</i> = 30)   | 0.07                                           | 51.56 ±21.34<br>( <i>n</i> = 32) | -0.25                               |
|           | 6m FU     | 492.27 ±119.50<br>( <i>n</i> = 27) | -3.05                             | 10.89 ±7.57<br>( <i>n</i> = 28) | 0.04                           | 24.02 ±18.38<br>( <i>n</i> = 28)   | -0.22                                          | 47.50 ±21.37<br>( <i>n</i> = 28) | 0.26                                |
| CBT       | EOT       | 473.98 ±113.85<br>( <i>n</i> = 18) | -1.26                             | 10.47 ±7.31<br>( <i>n</i> = 19) | -0.05                          | 22.50 ±15.50<br>( <i>n</i> = 18)   | 0.07                                           | 47.92 ±22.30<br>( <i>n</i> = 18) | -0.25                               |
|           | 6m FU     | 447.35 ±98.89<br>( <i>n</i> = 15)  | -3.05                             | 11.53 ±8.35<br>( <i>n</i> = 17) | 0.04                           | 20.79 ±17.09<br>( <i>n</i> = 17)   | -0.22                                          | 51.39 ±22.74<br>( <i>n</i> = 18) | 0.26                                |

*Note.* EOT = End-of-Treatment; m = month; FU = Follow-up time point; Cohen's *d* estimated as the difference in treatment means at each follow-up time point divided by square root of the sum of variances of random effects

Follow-up of yoga and CBT for GWI

Table 2

*Random effects of longitudinal outcomes in Pain Severity, Pain Interference, and Pain Total: Yoga Versus CBT*

|              | <b>BPI-SF Pain Severity</b> | <b>BPI-SF Pain Interference</b> | <b>BPI-SF Pain Total Score</b> |
|--------------|-----------------------------|---------------------------------|--------------------------------|
| $\sigma^2$   | 0.96                        | 1.49                            | 1.10                           |
| $\tau_{00}$  | 2.29 ID                     | 2.52 ID                         | 2.11 ID                        |
| $\tau_{11}$  | 0.01 ID baseline to EOT     | 0.01 ID baseline to EOT         | 0.01 ID baseline to EOT        |
| $\rho_{01}$  | 0.34 ID                     | 0.08 ID                         | 0.17 ID                        |
| ICC          | 0.75                        | 0.66                            | 0.70                           |
| N            | 71 ID                       | 70 ID                           | 70 ID                          |
| Observations | 383                         | 370                             | 370                            |

## Follow-up of yoga and CBT for GWI

Table 3

Yoga protocol targets, practices, and weekly class themes

| Target                                                                                   | Yoga Tool                                                                                                                                                                                                                                                                                                                                                              | Weekly Class Themes                                                                                                                                                                                                                                                                                                                                                                                                                                                                                                                                                                                                                                                                                                                                                                                                                                                                                                                                            |
|------------------------------------------------------------------------------------------|------------------------------------------------------------------------------------------------------------------------------------------------------------------------------------------------------------------------------------------------------------------------------------------------------------------------------------------------------------------------|----------------------------------------------------------------------------------------------------------------------------------------------------------------------------------------------------------------------------------------------------------------------------------------------------------------------------------------------------------------------------------------------------------------------------------------------------------------------------------------------------------------------------------------------------------------------------------------------------------------------------------------------------------------------------------------------------------------------------------------------------------------------------------------------------------------------------------------------------------------------------------------------------------------------------------------------------------------|
| Breath and sensation awareness                                                           | Natural breath, body scan                                                                                                                                                                                                                                                                                                                                              | <ol style="list-style-type: none"> <li>1. Seated and standing posture and use of yoga props for posture adjustment</li> <li>2. Cultivating compassion for yourself first and then others</li> <li>3. Focus on maintaining Ujayii breathing during class</li> <li>4. Move slowly and find comfort in each yoga posture and breath practice</li> <li>5. Repeat of week 4</li> <li>6. Be mindful of what is “right” with and for us in this moment</li> <li>7. Be mindful of how pain has become familiar – like a protective shell – but we no longer need it and can let it go</li> <li>8. Focus on slow gentle breath throughout the practice</li> <li>9. Finding balance and what is “just right” for us in today’s practice as in the Goldilocks tale</li> <li>10. Last day – reminder to bring yoga into your day-to-day life by paying attention to your body, mind, and spirit and be content with just enough – not too much, not too little.</li> </ol> |
| Balancing, calming, activating breath practices                                          | Sama Vritti, Surya Bhyedan, Nadi Shodhana, Ujayii, Simha, Brahmari, Kapalabhati, Breath of Joy                                                                                                                                                                                                                                                                         |                                                                                                                                                                                                                                                                                                                                                                                                                                                                                                                                                                                                                                                                                                                                                                                                                                                                                                                                                                |
| Posture and alignment                                                                    | Seated or standing Tadasana                                                                                                                                                                                                                                                                                                                                            |                                                                                                                                                                                                                                                                                                                                                                                                                                                                                                                                                                                                                                                                                                                                                                                                                                                                                                                                                                |
| Focused breath with movement                                                             | Seated or standing adaptive Sun Salutations, flexion & extension of the spine (cat/cow)                                                                                                                                                                                                                                                                                |                                                                                                                                                                                                                                                                                                                                                                                                                                                                                                                                                                                                                                                                                                                                                                                                                                                                                                                                                                |
| Musculoskeletal strength, balance and flexibility AND moving with the pace of the breath | Virabhadrasana I & II, Utthita Tadasana, Utkatasana, Vatayanasana, Urdhva Hastasana with lateral bend, Prasarita Padottanasana, Parvostanasana, Vrikshasana, modified Supta Padangusthasana, Ardha Matsyendrasana, Vasisthasana, modified Salabhasana, Balasana, Bent Knee/Tabletop internal oblique strengthen, modified Paripurna Navasana, Setu Bandha Sarvangasana |                                                                                                                                                                                                                                                                                                                                                                                                                                                                                                                                                                                                                                                                                                                                                                                                                                                                                                                                                                |
| Gastrointestinal Health                                                                  | Apanasana, Bananasana, Supta Baddha Konasana                                                                                                                                                                                                                                                                                                                           |                                                                                                                                                                                                                                                                                                                                                                                                                                                                                                                                                                                                                                                                                                                                                                                                                                                                                                                                                                |
| Calming                                                                                  | Makarasana, Jathara Parivartanasana, Viparita Karani, Savasana                                                                                                                                                                                                                                                                                                         |                                                                                                                                                                                                                                                                                                                                                                                                                                                                                                                                                                                                                                                                                                                                                                                                                                                                                                                                                                |
| Hand Gestures                                                                            | Anjali, Surya, Mrigi Mudras                                                                                                                                                                                                                                                                                                                                            |                                                                                                                                                                                                                                                                                                                                                                                                                                                                                                                                                                                                                                                                                                                                                                                                                                                                                                                                                                |
